# Supplementary material for: Kinetic models assessment for swelling of coal induced by methane and carbon dioxide sorption
Source: Springer Nature journal article supplement (doi:10.1007/s10450-016-9775-z), 2016-02-05
Supplement: MOESM1 [file 7452238]

**Adsorption** (special ISSAC–9 issue)

Supporting Information

Kinetic models assessment for swelling of coal induced by methane and carbon dioxide sorption

Katarzyna Czerw\*, Katarzyna Zarębska, Bronisław Buczek, Paweł Baran

*AGH University of Science and Technology, Faculty of Energy and Fuels,  
Aleja Mickiewicza 30, 30-059 Cracow, Poland*

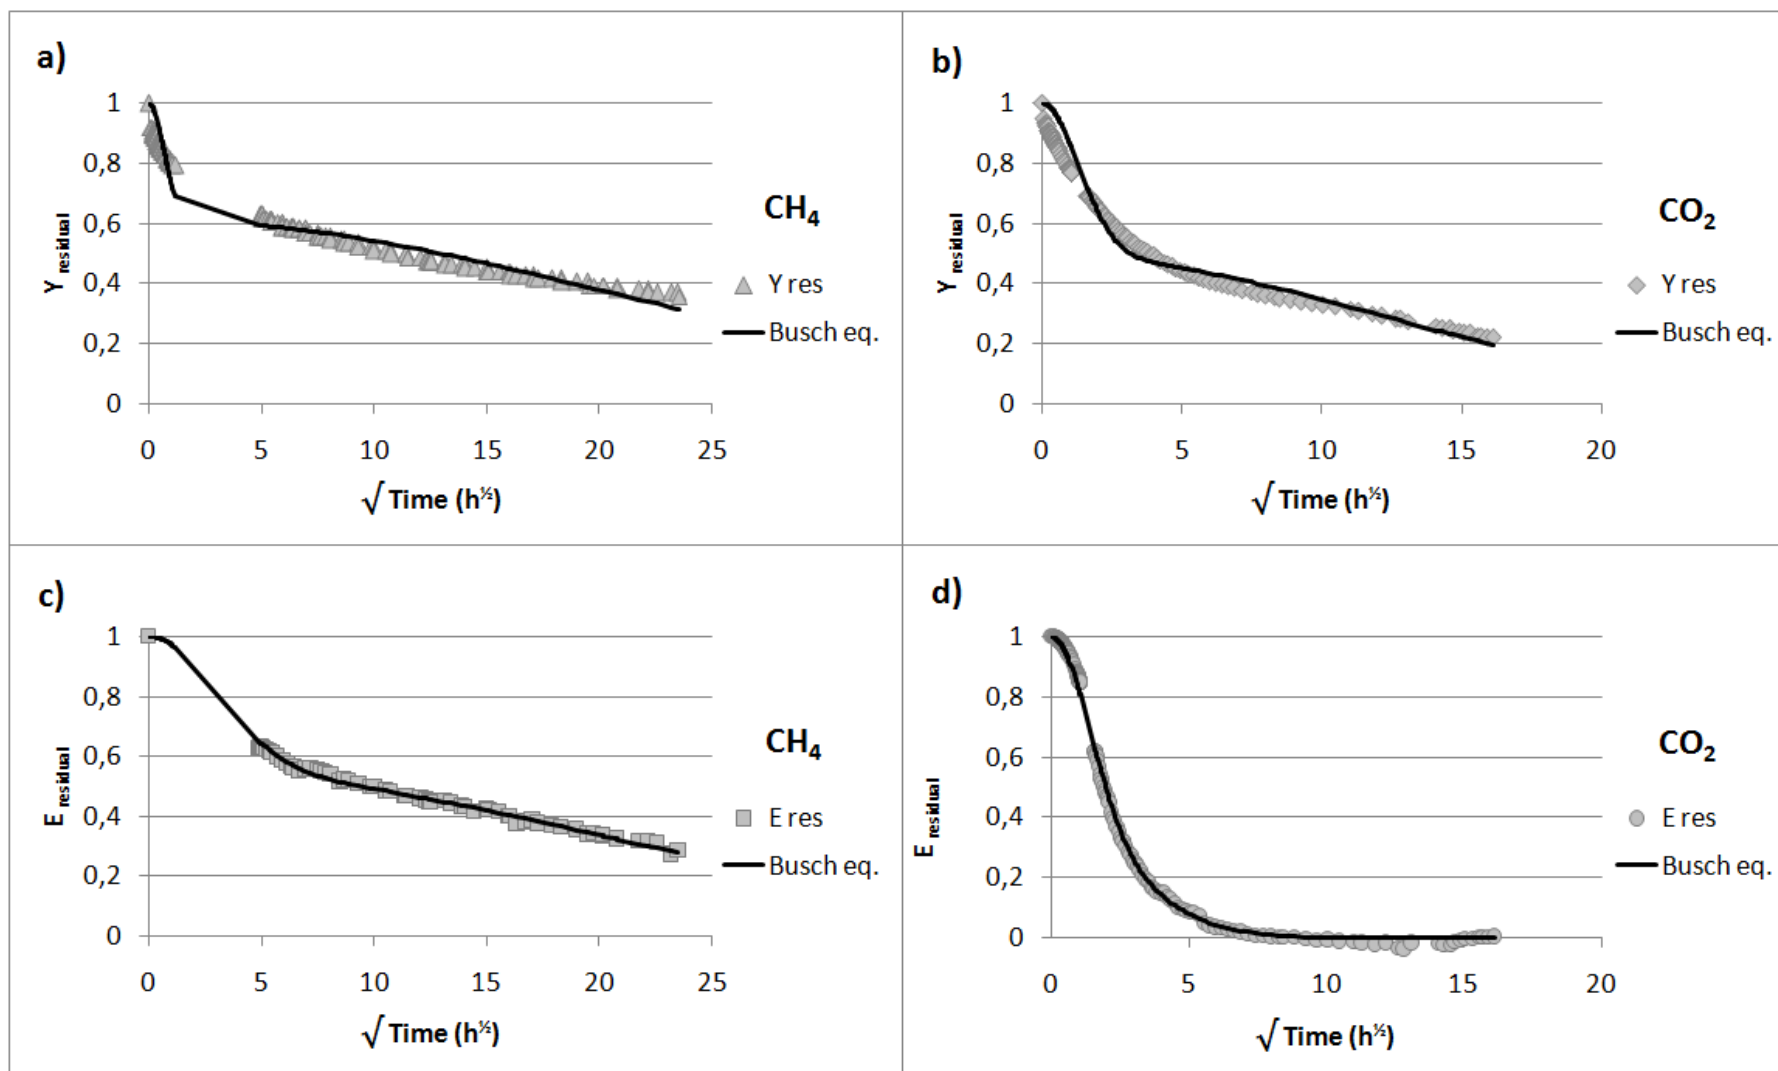

**Fig. S1** Application of the Busch equations to the kinetics for (a) CH<sub>4</sub> and (b) CO<sub>2</sub> sorption (Eq. (1)), and the sorption-induced coal swelling kinetics for (c) CH<sub>4</sub> and (d) CO<sub>2</sub> (Eq. (2))

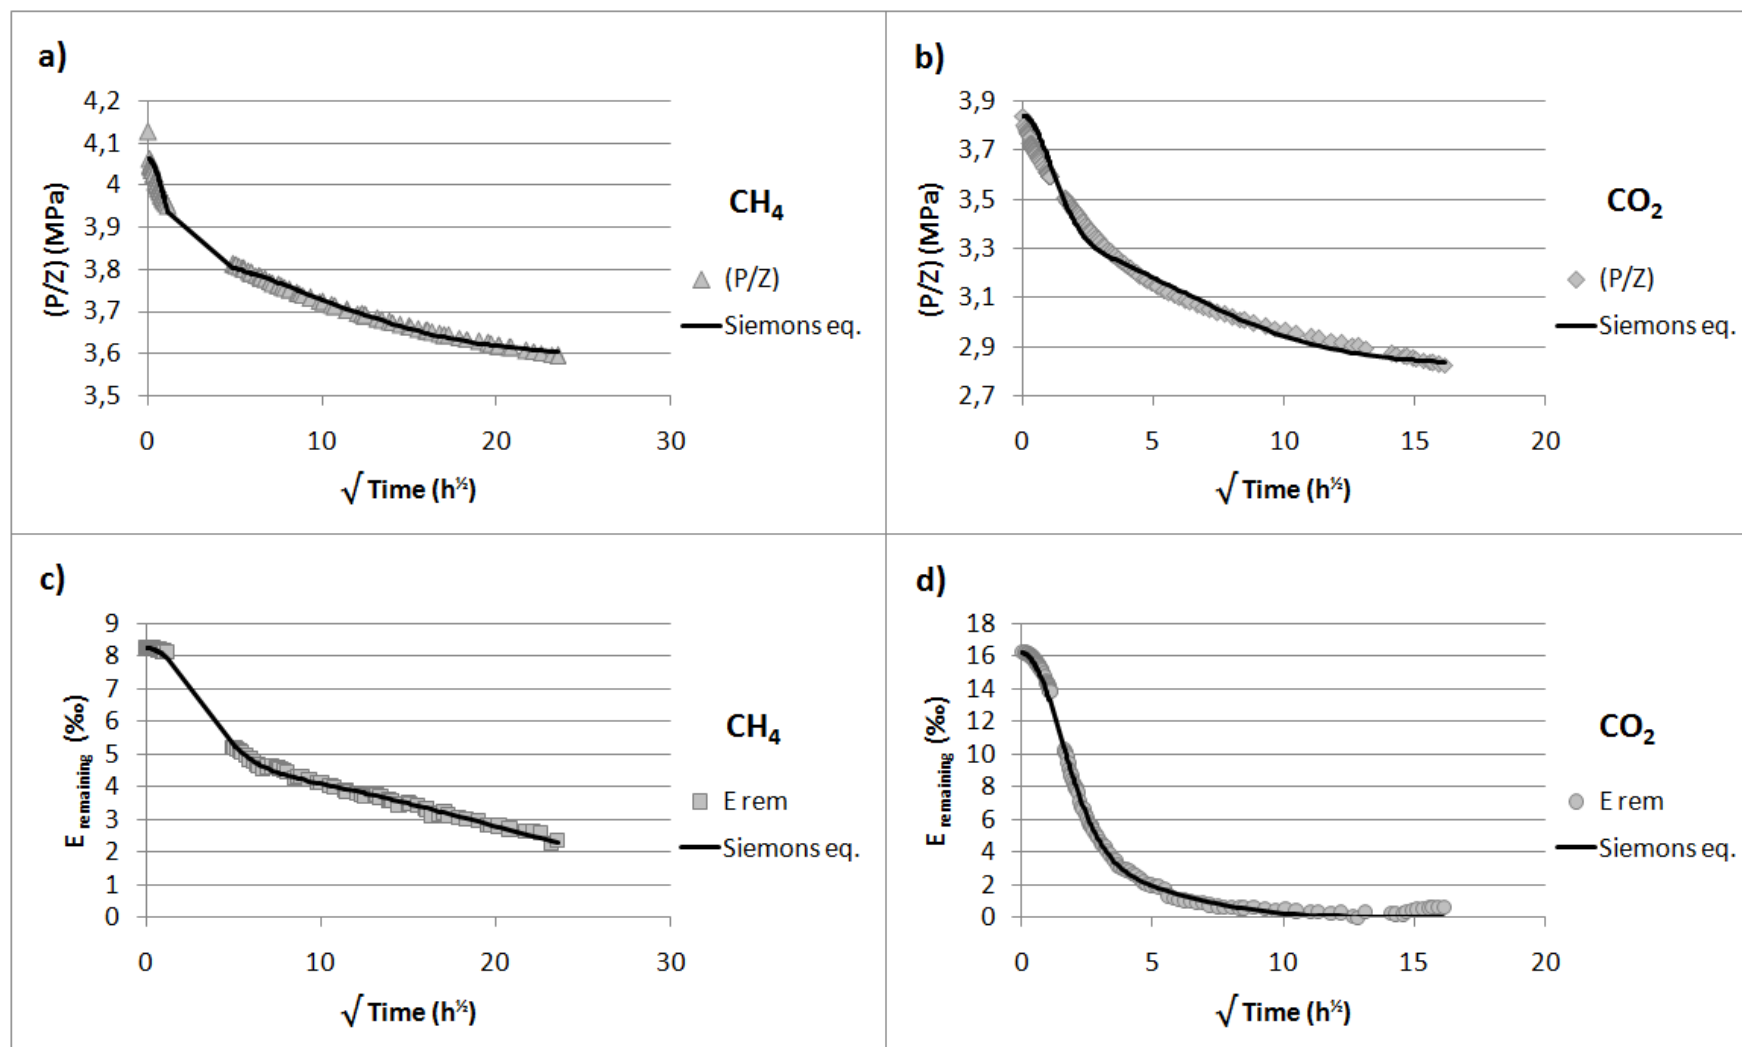

**Fig. S2** Application of the Siemons equations to the kinetics for (a)  $\text{CH}_4$  and (b)  $\text{CO}_2$  sorption (Eq. (3)), and the sorption-induced coal swelling kinetics for (c)  $\text{CH}_4$  and (d)  $\text{CO}_2$  (Eq. (4))

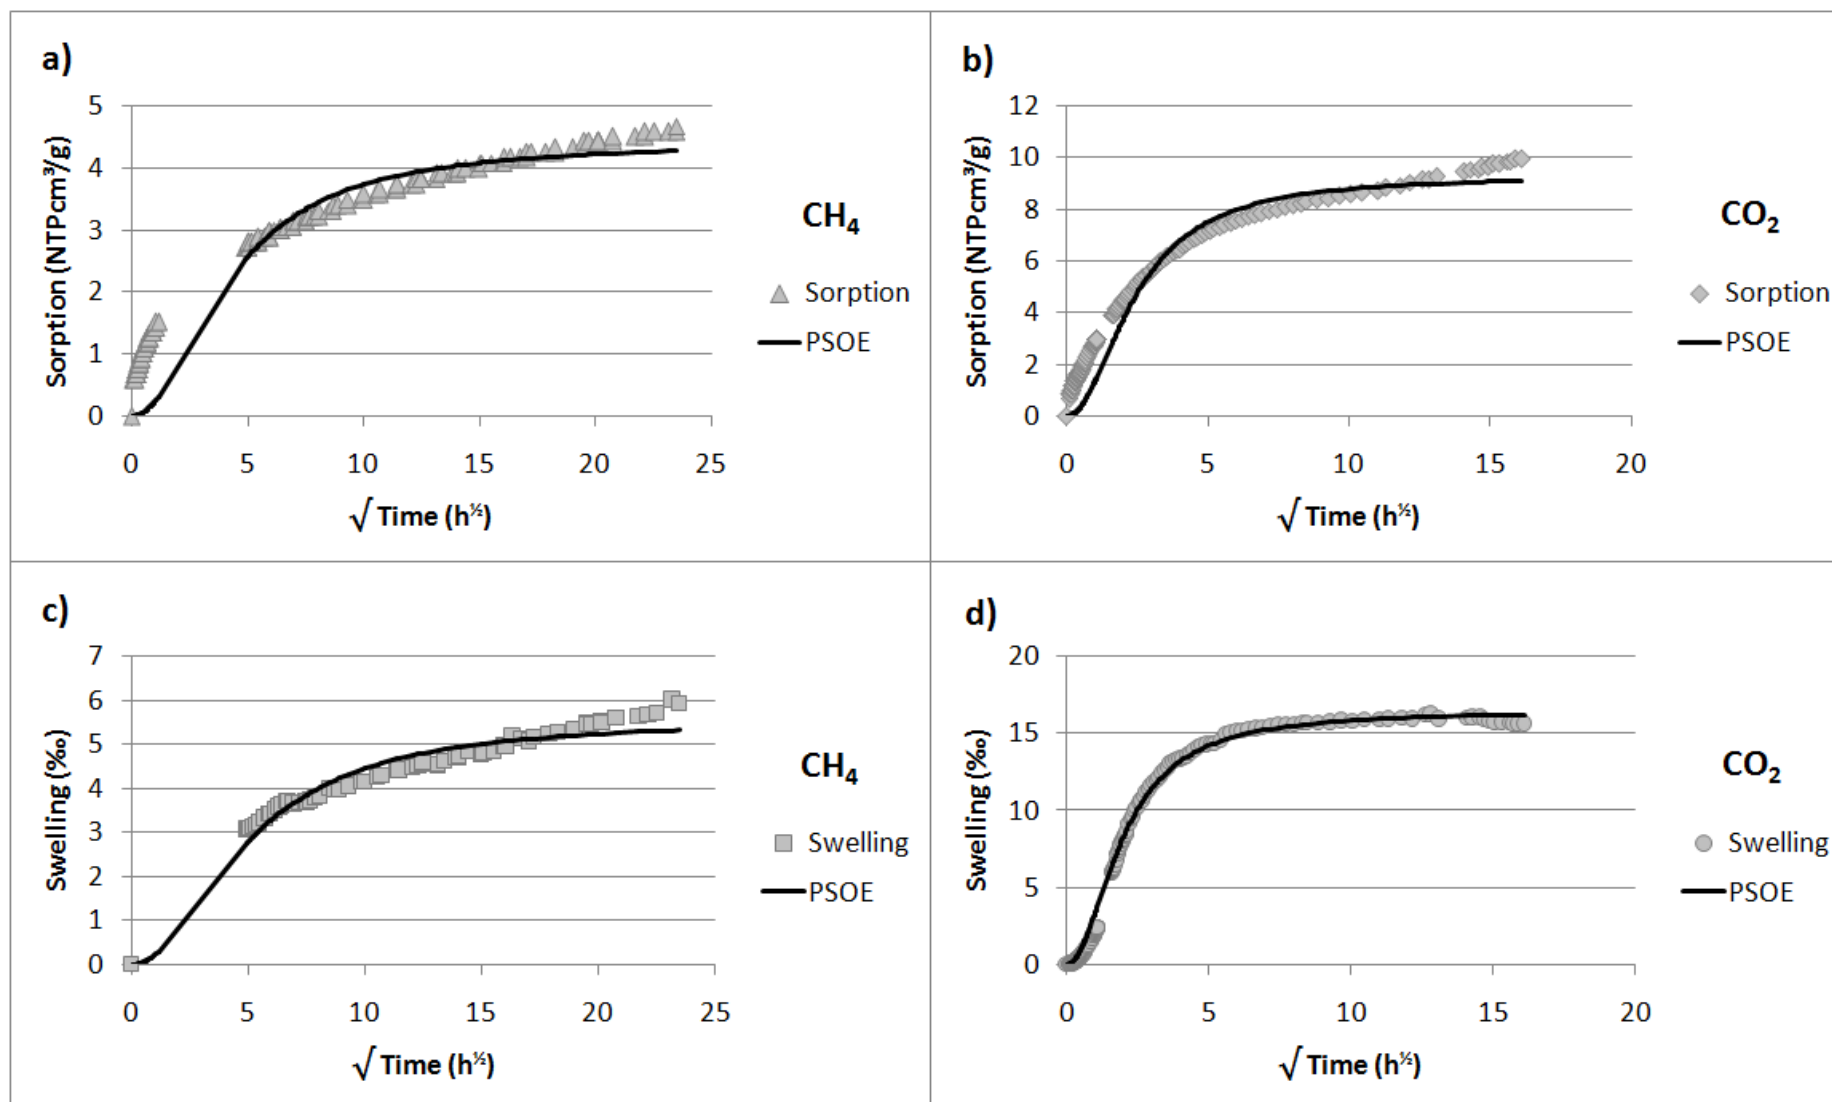

**Fig. S3** Application of the PSOEs to the kinetics for (a) CH<sub>4</sub> and (b) CO<sub>2</sub> sorption (Eq. (7)), and the sorption-induced coal swelling kinetics for (c) CH<sub>4</sub> and (d) CO<sub>2</sub> (Eq. (8))

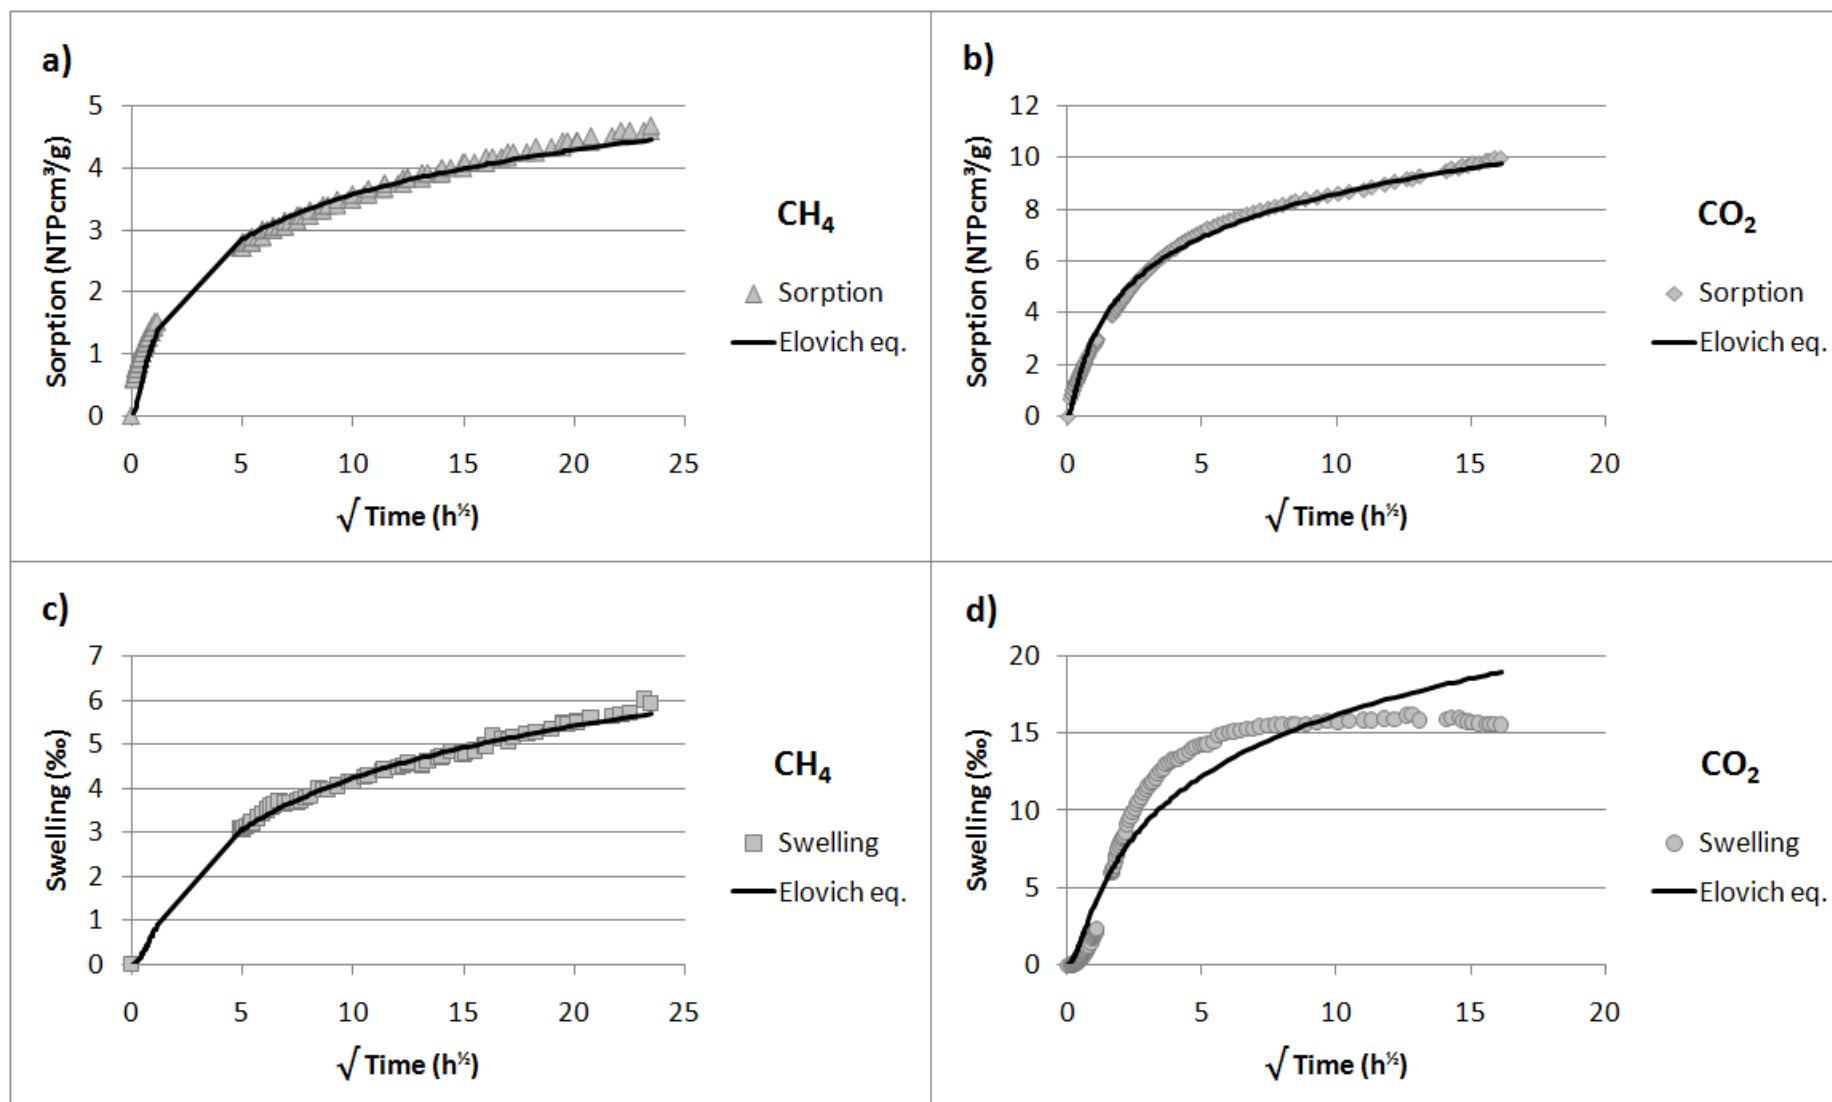

**Fig. S4** Application of the Elovich equations to the kinetics for (a) CH<sub>4</sub> and (b) CO<sub>2</sub> sorption (Eq. (9)), and the sorption-induced coal swelling kinetics for (c) CH<sub>4</sub> and (d) CO<sub>2</sub> (Eq. (10))

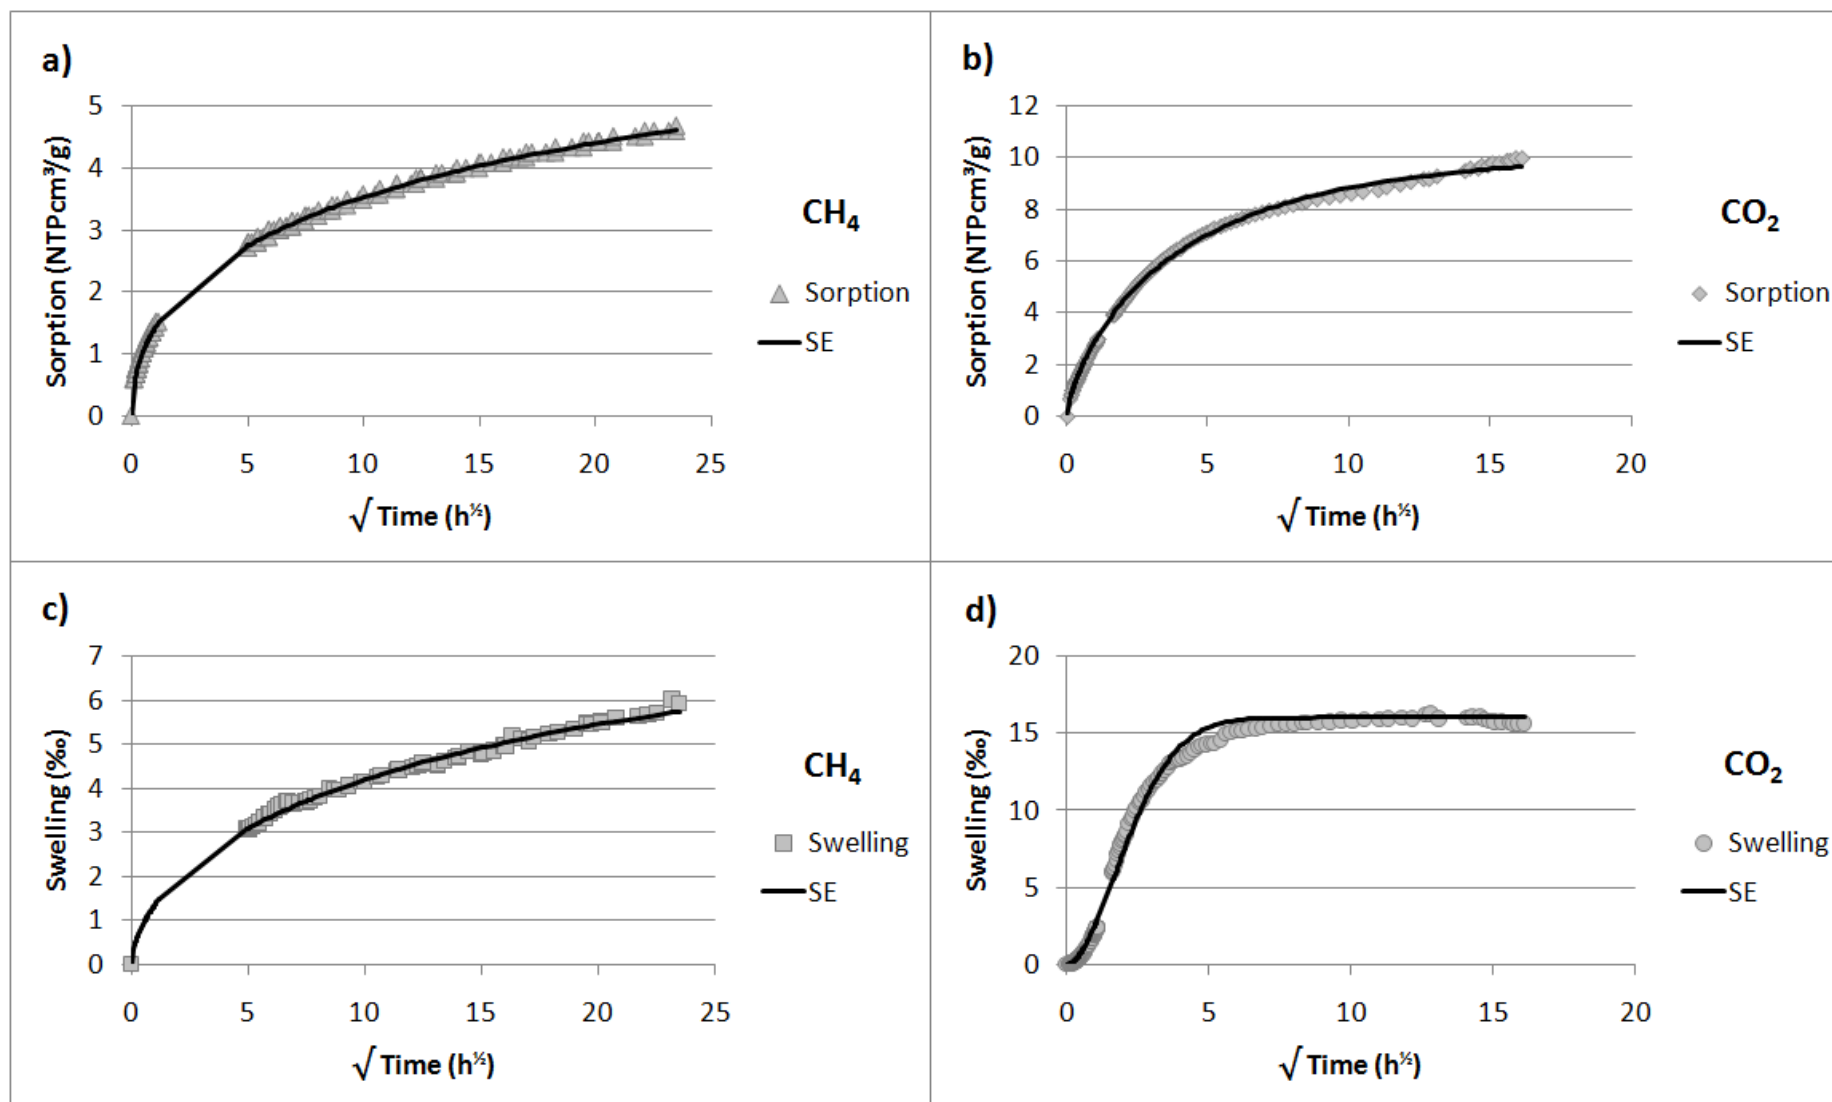

**Fig. S5** Application of the SE equations to the kinetics for (a) CH<sub>4</sub> and (b) CO<sub>2</sub> sorption (Eq. (11)), and the sorption-induced coal swelling kinetics for (c) CH<sub>4</sub> and (d) CO<sub>2</sub> (Eq. (12))
